# Supplementary material for: N-Halamine modified thermoplastic polyurethane with rechargeable antimicrobial function for food contact surface
Source: Royal Society of Chemistry journal article supplement (doi:10.1039/c6ra25502g), 2017-01-01
Supplement: c6ra25502g1.pdf [file c6ra25502g1.pdf]

1 **Supporting Information**

2  
3 **N-halamine Modified Thermoplastic Polyurethane with Rechargeable Antimicrobial**

4 **Function for Food Contact Surface**

5  
6 **Mingyu Qiao <sup>a</sup>, Tian Ren <sup>a</sup>, Tung-Shi Huang <sup>a\*</sup>, Jean Weese <sup>a</sup>, Ying Liu <sup>b</sup>, Xuehong Ren <sup>b</sup>, Ramsis**

7 **Farag <sup>c,d</sup>**

8 <sup>a</sup> Department of Poultry Science, Auburn University, Auburn, AL 36849, USA

9 <sup>b</sup> Key Laboratory of Eco-Textiles of Ministry of Education, College of Textiles and Clothing, Jiangnan

10 University, Wuxi, Jiangsu 214122, China

11 <sup>c</sup> Center for Polymer and Advanced Composites, Auburn University, Auburn, AL 36849, USA

12 <sup>d</sup> Textile Engineering Department, Mansoura University, ElMansoura 33516, Egypt

13  
14 \*Corresponding author:

15 Tung-Shi Huang, PhD

16 Professor, Department of Poultry Science, Auburn University

17 Email: [huangtu@auburn.edu](mailto:huangtu@auburn.edu); Phone: (334) 844-3290

18 Address: 201 Poultry Science Building, 260 Lem Morrison Drive, Auburn, AL 36849, USA

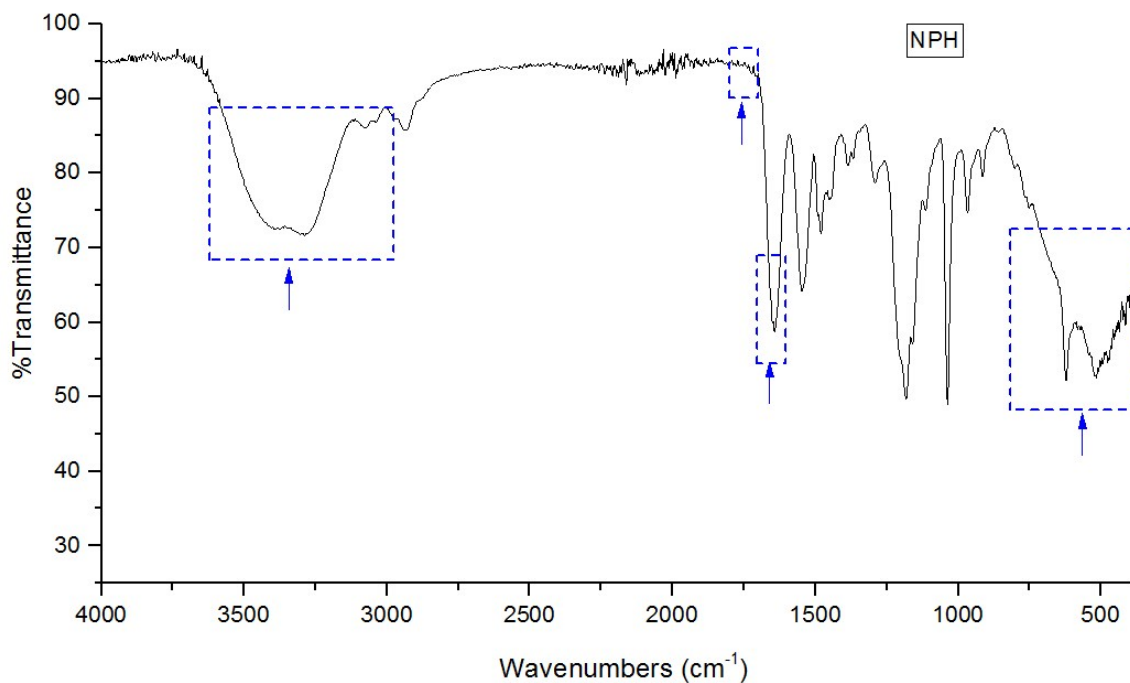

Figure S1. FTIR spectra of N-halamine precursor polymer blend

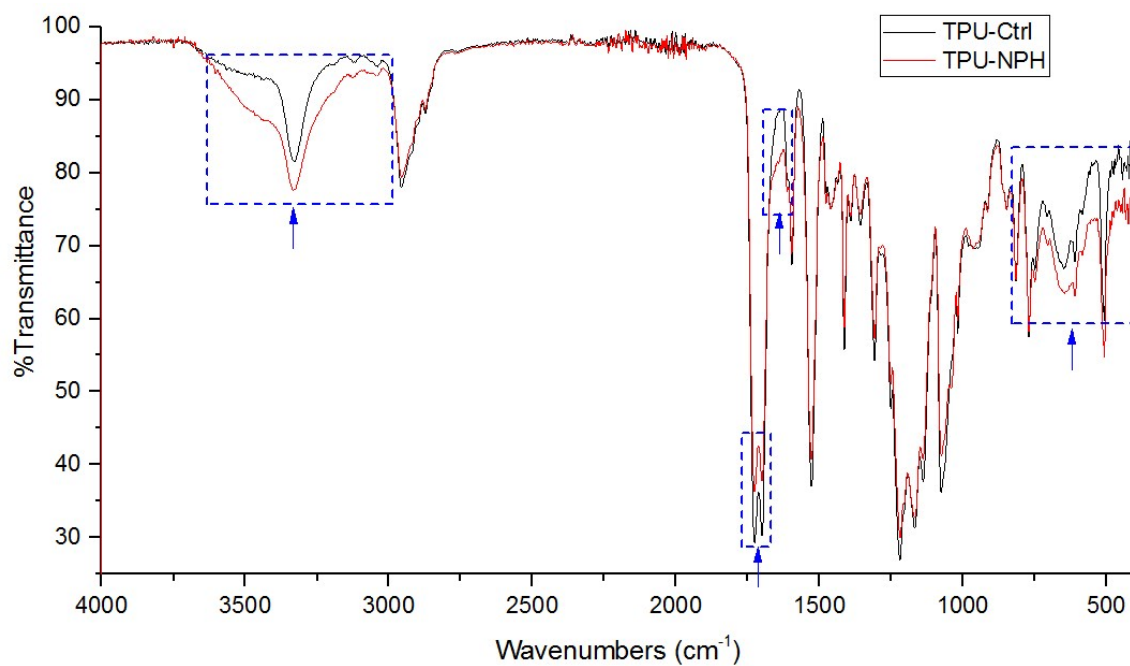

Figure S2. FTIR spectra of control TPU (TPU-Ctrl) and N-halamine precursor polymer modified TPU (TPU-NPH).
